# Supplementary material
Source: PubMed Central journal article supplement (PMC3683709)
Supplement: 1307575110_pnas.201307575SI.pdf [file 1307575110_pnas.201307575SI.pdf]

# Supporting Information

Hu et al. 10.1073/pnas.1307575110

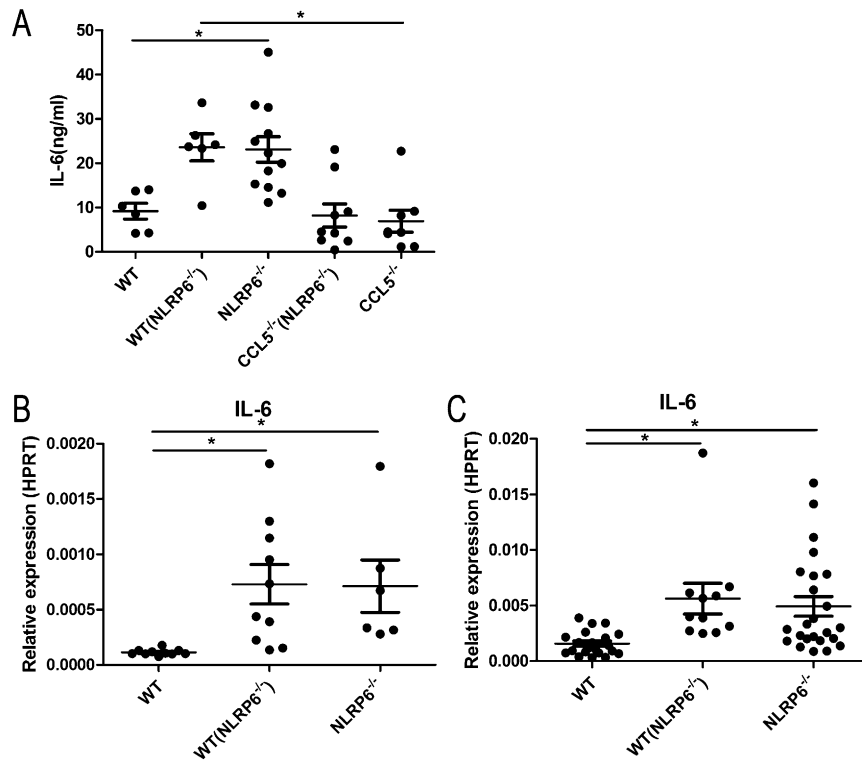

**Fig. S1.** Enhanced IL-6 expression in NOD-like receptor family pyrin domain containing 6 (NLRP6)<sup>-/-</sup> cohoused WT mice but not chemokine (C-C motif) ligand 5 (CCL5)<sup>-/-</sup> mice. IL-6 protein concentration measurement (A) by ELISA in colonic tissue explant of separately housed WT mice, WT mice cohoused with NLRP6<sup>-/-</sup> mice [designated WT(NLRP6<sup>-/-</sup>)], NLRP6<sup>-/-</sup> mice, CCL5<sup>-/-</sup> mice cohoused with NLRP6<sup>-/-</sup> mice [designated CCL5<sup>-/-</sup>(NLRP6<sup>-/-</sup>)], and CCL5<sup>-/-</sup> mice harvested at day 15 of the CAC regimen. Data are mean ± SEM; *n* ≥ 5; \**P* < 0.05 by one-way ANOVA. The experiments were repeated two times. IL-6 mRNA expression in colonic tissue (B) and tumor tissue (C) of WT mice, WT mice cohoused with NLRP6<sup>-/-</sup> mice [designated WT(NLRP6<sup>-/-</sup>)], and NLRP6<sup>-/-</sup> mice was measured after the cessation of the last cycle of dextran sodium sulfate (DSS) and water treatment. Data are mean ± SEM; *n* ≥ 6; \**P* < 0.05 by one-way ANOVA. The experiments were repeated two times.
